# Supplementary material
Source: PubMed Central journal article supplement (PMC9006784)
Supplement: NEJMc2201821_appendix.pdf [file NEJMc2201821_appendix.pdf]

## Supplementary Appendix

Supplement to: Yoon SK, Hegmann KT, Thiese MS, et al. Protection with a third dose of mRNA vaccine against SARS-CoV-2 variants in frontline workers. *N Engl J Med*. DOI: 10.1056/NEJMc2201821

This appendix has been provided by the authors to give readers additional information about the work.

# Supplementary Appendix

This appendix has been provided by the authors to give readers additional information about their work.

## Contents

|                                                                                                                                                                                                           |    |
|-----------------------------------------------------------------------------------------------------------------------------------------------------------------------------------------------------------|----|
| HEROES-RECOVER Network Acknowledgements .....                                                                                                                                                             | 2  |
| Methods.....                                                                                                                                                                                              | 4  |
| Study Design and Methodology.....                                                                                                                                                                         | 4  |
| Laboratory Testing.....                                                                                                                                                                                   | 7  |
| Statistical Analysis.....                                                                                                                                                                                 | 8  |
| Supplemental Results .....                                                                                                                                                                                | 12 |
| Figure S1a. CONSORT diagram of HEROES-RECOVER prospective cohort participants: Delta Variant Predominance.....                                                                                            | 12 |
| Figure S1b. CONSORT diagram of HEROES-RECOVER prospective cohort participants: Omicron Variant Predominance .....                                                                                         | 13 |
| Table S1. Participant characteristics by COVID-19 vaccination status at the end of the study period, August 2021 to January 2022.....                                                                     | 14 |
| Table S2. Distribution of Participant Person-time Contributed to Vaccination Status Categories According to Virus and Participant Characteristics* .....                                                  | 16 |
| Table S3. Comparison of SARS-CoV-2 Delta and Omicron variant infection clinical characteristics among unvaccinated HEROES-RECOVER study participants.....                                                 | 18 |
| Table S4. Representativeness of HEROES-RECOVER Study Participants.....                                                                                                                                    | 18 |
| Figure_S2a. Standardized mean differences of covariates between unvaccinated and vaccinated participants during Delta predominance era before and after inverse propensity of treatment weighting.....    | 19 |
| Figure_S2b. Standardized mean differences of covariates between 2-dose and 3-dose vaccinated participants during Delta predominance era before and after inverse propensity of treatment weighting.....   | 20 |
| Figure_S2c. Standardized mean differences of covariates between unvaccinated and vaccinated participants during Omicron predominance era before and after inverse propensity of treatment weighting.....  | 21 |
| Figure_S2d. Standardized mean differences of covariates between 2-dose and 3-dose vaccinated participants during Omicron predominance era before and after inverse propensity of treatment weighting..... | 22 |

## HEROES-RECOVER Network Acknowledgements

On behalf of HEROES-RECOVER Network, Lauren E.W. Olsho, Laura J. Edwards, Danielle R. Hunt, Tyler C. Morrill, Brandon P. Poe, Brian Sokol, John Thacker, Tana Brummer, Andrea Bronaugh, James Carr, Hala Deeb, Sauma Doka, Claire Douglas, Kate Durocher, Tara Earl, Jini Etolue, Deanna Fleary, Isaiah Gerber, Kimberly Groover, Louise Hadden, Jenna Harder, Ed Hock, Keya Jacoby, Ryan Klein, Lindsay LeClair, Nancy McGarry, Steve Pickett, Khaila Prather, David Pulaski, Rajbansi Raorane, Alfredo Rodriguez-Nogues, Meghan Shea, Chao Zhou, **Abt Associates**; Michael E. Smith, Kempapura Murthy, Spencer Rose, Nicole Calhoun, Eric Hoffman, Martha Zayed, Joel Blais, Jason Ettlinger, Angela Kennedy, Natalie Settele, Rupande Patel, Elisa Priest, Jennifer Thomas, Madhava Beeram, Alejandro Arroliga, **Baylor Scott & White Health**; Mark G. Thompson, Ashley L. Fowlkes, Lauren Grant, Julie Mayo Lamberte, Young M. Yoo, Josephine Mak, Monica Dickerson, Eduardo Azziz-Baumgartner, Melissa L. Arvay, Preeta Kutty, Alicia M. Fry, **CDC**; Yolanda Prado, Daniel Sapp, Mi Lee, Chris Eddy, Matt Hornbrook, Donna Eubanks, Danielle Millay, Dorothy Kurdyla, Kristin Bialobok, Ambrosia Bass, Kristi Bays, Kimberly Berame, Cathleen Bourdoin, Carlea Buslach, Jennifer Gluth, Kenni Graham, Tarika Holness, Enedina Luis, Abreeanah Magdaleno, DeShaun Martin, Joyce Smith-McGee, Martha Perley, Sam Peterson, Aaron Piepert, Krystil Phillips, Joanna Price, Sperry Robinson, Katrina Schell, Emily Schield, Natosha Shirley, Anna Shivinsky, Britta Torgrimson-Ojerio, Brooke Wainwright, Shawn Westaway, **Kaiser Permanente Northwest**; Jennifer Meece, Elisha Stefanski, Lynn Ivacic, Jake Andreae, Adam Bissonnette, Krystal Boese, Michaela Braun, Cody DeHamer, Timothy Dziedzic, Joseph Eddy, Heather Edgren, Wayne Frome, Nolan Herman, Mitchell Hertel, Erin Higdon, Rosebud Johnson, Steve Kaiser, Tammy Koepel, Sarah Kohn, Taylor Kent, Thao Le, Carrie Marcis, Megan Maronde, Isaac McCready, Nidhi Mehta, Daniel Miesbauer, Anne Nikolai, Brooke Olson, Lisa Ott, Cory Pike, Nicole Price, Christopher Reardon, Logan Schafer, Rachel Schoone, Jaclyn Schneider, Tapan Sharma, Melissa Strupp, Janay Walters, Alyssa Weber, Reynor Wilhorn, Ryan Wright, Benjamin Zimmerman, **Marshfield Clinic Research Laboratory**; Harmony Tyner, Angela Hunt, Jessica Lundgren, Karley Respet, Jennifer Viergutz, Daniel Stafki, **St. Luke's Regional Health Care System**; Karen Lutrick, Patrick Rivers, Ariyah Armstrong, Nora Baccam, Edward Bedrick, Maiya Block Ngaybe, Jefferey L. Burgess, Tatum Butcher, Shelby Capell, Hannah Cowling, Carly Deal, Kiara Earley, Katherine D. Ellingson, Dimaye Calvo, Andrea Carmona, Alissa Coleman, Zoe Baccam, Kiara Earley, Katherine Ellingson, Sophie Evans, Joe K. Gerald, Erika Goebert, Taylor Graham, Sofia Grijalva, Chloe Hendrix, Katherine Herder, Adrianna Hernandez, Raven Hilyard, James Hollister, Rezwana Islam, Krystal S. Jovel, Sana Khan, Caroline Klinck, Karla Ledezma, Sally Littau, Amelia Lobos, Ashley Lowe, Karen Lutrick, Jeremy Makar, Natalya Mayhew, Kristisha Mevises, Flavia Nakayima Miro, Janko Nikolich-Žugich, Assumpta Nsengiyunva, Kennedy Obrien, Mya Pena, Cynthia Porter, Patrick Rivers, James K. Romine, Priyanka Sharma, Alison Slocum, Saskia Smidt, Jayla Soowell, Danielle Stea, Nicholas Tang, Gianna Taylor, Heena Timsina, Italia Trejo, April Yingst, **University of Arizona**; Alberto Caban-Martinez, Natasha Schaefer-Solle, Carlos Silvera, Cynthia Beaver,

Roger Noriega, Alexandra Cruz, Damena Gallimore-Wilson, Rachel Reyes, Christian Rojas, Catalina Gonzalez, Addison Testoff, Alex Stewart, Kemi Ogunsina, Aimee Green, Johanna Garibaldi, Nathaly Suarez, Olga Carrera, Hannah Kling, **University of Miami**; Matthew Bruner, Rachel Brown, Jenna Praggastis, Marcus Stucki, Arlyne Arteaga, Riley Campbell, Madeleine Smith, Adriele Fugal, Maya Wheeler, Gretchen Maughan, Allana Soriano, Nikki Gallacher, Anika Dsouza, Lauren Anderson, Jenna Vo, Trevor Stubbs, Iman Ibrahim, Tristen Forbes, Taryn Hunt-Smith, Ryder Jordin, Michael Langston, Timina Powaukee, Daniel Dawson, Kathy Tran, Fiona Tsang, Hannah Whiting, Emilee Eden, Braydon Black, Christina Pick, Madison Tallman, Chapman Cox, Derrick Wong, Camie Schaefer, Kurt T. Hegmann, Jeanmarie Mayer, Joseph Stanford, **University of Utah**; Allen Bateman, Erik Reisdorf, Kyley Guenther, Erika Hanson, **Wisconsin State Laboratory of Hygiene**; and, we thank the **HEROES-RECOVER cohort participants**.

## Methods

### Study Design and Methodology

#### **Population**

The HEROES-RECOVER network consists of the Arizona Healthcare, Emergency Response and Other Essential Workers Surveillance (HEROES) study conducted in Phoenix, Tucson, and other areas, and the Research on the Epidemiology of SARS-CoV-2 in Essential Response Personnel (RECOVER) study conducted in Florida (Miami), Minnesota (Duluth), Oregon (Portland), Texas (Temple), and Utah (Salt Lake City). Both studies use consistent methods that have been published previously.<sup>1-3</sup> Frontline workers (including healthcare personnel (HCP), first responders (FR), and other essential and frontline workers (EFW) working at least 20 hours per week and having close contact with (within 3 feet) coworkers, customers, patients, or the public as part of their routine work) were eligible for recruitment. To minimize potential selection biases, recruitment of participants was stratified according to site, sex, age group, and occupation with a minimum number of enrollees per stratum, depending on site enrollment targets. All participants provided written informed consent. The individual protocols for the RECOVER study and the HEROES study were reviewed and approved by the institutional review boards at participating sites or under a reliance agreement.

#### **Active Surveillance**

Participants self-collect a mid-turbinate nasal specimen using a flocked swab placed in viral transport medium (VTM) on a weekly basis, regardless of whether they had symptoms associated with COVID-19. Participants provide an additional dry foam anterior nasal swab and saliva specimen at the onset of a COVID-19-like illness (CLI). Participants are provided with

training and materials for the self-collection of each specimen type at enrollment. Participants are given written and visual detailed instructions for collecting, storing, and submitting specimens by dropping them off at a specified location, having them picked up by an at-home courier, or shipping them according to guidance and specifications from the US Food and Drug Administration. Supplies and instructions for participants were standardized across sites.

Specimens are shipped on day of collection unfrozen (on ice packs) and tested by means of qualitative reverse-transcriptase—polymerase-chain-reaction (RT-PCR) assay at the Marshfield Clinic Research Institute (Marshfield, WI). Quantitative RT-PCR assays are conducted at the Wisconsin State Laboratory of Hygiene (Madison, WI). SARS-CoV-2 whole-genome sequencing is conducted at the Centers for Disease Control and Prevention, in accordance to previously published protocols<sup>5</sup>. All study sites use a common protocol and data collection instruments approved by their institutional review boards (IRBs), as well as standard operating procedures.

### **Participant Data Collection**

Data collection is conducted using REDCap software (Vanderbilt University, Nashville, TN, USA). Participants report via SMS using the Twilio platform that can directly integrate with REDCap for online surveys. Upon enrollment, participants complete an online survey to provide detailed occupation, sociodemographic, and health characteristics. Approximately every four months, a follow up survey is distributed to update information collected upon enrollment. In addition, these surveys may include assessments of participant knowledge, attitudes, and practices regarding COVID-19 vaccines, adverse reactions to vaccination, and any illnesses that may not have been reported during routine screening.

Active surveillance for symptoms associated with COVID-19 — defined as fever, chills, cough, shortness of breath, sore throat, diarrhea, muscle aches, or a change in smell or taste — is conducted through weekly text messages, emails, and reports obtained directly from the participant or from medical records. When a COVID-19–like illness is identified, participants complete electronic surveys at the beginning and end of the illness to indicate the date of symptom onset, symptoms, temperatures, the number of days spent sick in bed for at least half the day, and the last day of symptoms. Febrile symptoms associated with COVID-19 is defined as fever, feverishness, chills, or a measured temperature higher than 38°C. In the survey, participants report receipt of medical care. Medically attended care is defined as telemedicine, physician office, emergency room, or urgent care encounters, and hospitalizations related to the illness.

In addition to the weekly questions to assess COVID-19–like illness, participants are also asked one of four “rotating” questions, such that each question is asked approximately monthly. Weeks 1-3 ask setting-based questions that report their potential exposure to SARS-CoV-2 and their use of face masks and other employer-recommended personal protective equipment (PPE) according to: hours of close contact with (within 3 feet [1 m] of) others at work (coworkers, customers, patients, or the public) in the previous 7 days; the percentage of time using PPE during those hours of close contact at work; hours of close contact with someone suspected or confirmed to have COVID-19 at work, at home, or in the community in the previous 7 days; and the percentage of time using PPE during those hours of close contact with the virus. The 4<sup>th</sup> week asks about either worry about COVID-19 infection risk (AZ only) or sleep quality.

### **Electronic Medical Record (EMR) Data Collection**

In the Minnesota, Oregon, Texas and Utah sites, EMR are monitored routinely to identify medical visits for acute respiratory or COVID-19-like illness. EMR data are also extracted to assess chronic medical conditions, influenza and COVID-19 vaccination data.

## Laboratory Testing

### Real-time RT-PCR

RNA extraction was performed using the MagMAX Viral/Pathogen Nucleic Acid Isolation Kit on the KingFisher Flex system. RT-PCR was performed using the TaqPath™ COVID-19 Combo Kit on the QuantStudio 7 Pro real-time RT-PCR system. Positive specimens were defined as having at least two SARS-CoV-2 targets (ORF1ab, N gene, S gene) with a threshold cycle (Ct) value  $\leq 37$  per manufacturer's instructions.<sup>4</sup> Approximately 20% of specimens were randomly selected for re-testing as part of routine quality control testing procedures.

### Genetic Sequencing

Available specimens with  $< 32$  Ct value by RT-PCR were subjected to SARS-CoV-2 whole genome sequencing by the Illumina MiSeq platform following previously published protocols.<sup>5</sup> Additional RT-PCR amplicon amplification followed by Sanger sequencing was applied to the samples with incomplete genome sequences after initial MiSeq sequencing.<sup>5</sup> Consensus sequences were generated with Iterative Refinement Meta-Assembler (IRMA) ([IRMA v1.0.2 with LABEL v0.6.3 for Linux & Mac OS X, 03-2021](#)) and the SARS CoV-2 genome sequence lineage call was based on PANGOLIN v2.3.8 (<https://github.com/cov-lineages/pangolin>). Lineages were categorized as variants of concern, variants of interest, wild type, or other variants according to criteria published by CDC: SARS-CoV-2 Variant Classifications and Definitions:



<https://www.cdc.gov/coronavirus/2019-ncov/cases-updates/variant-surveillance/variant-info.html>.

## Statistical Analysis

### Participant Inclusion

This analysis covers the period from August 26, 2021 until January 22, 2022. Participants were included for analysis if they were participating in surveillance during the study period and did not have a documented SARS-CoV-2 infection prior to this study period. The final analytic sample included 3,241 unique participants across the Delta and Omicron periods. The final analytic period for Delta included 3,163 participants with a median 95% (IQR: 97%-100%) compliance with weekly swabbing. For the Omicron period, 2,831 participants were included with a median 100% (IQR: 86%-100%) swabbing compliance. See **Figures S1a and S1b** for inclusion into each analytic period for Delta and Omicron, and VE Sensitivity Analyses section that addresses the potential for bias due to excluding participants.

### Person-time

Person-time was calculated as the total days under surveillance for a given vaccination status during the study period. Person-time for first and second dose started 14 days after vaccine receipt of an mRNA vaccine and person-time for third dose 7 days after vaccine receipt. The interim 14 days and 7 days were censored as indeterminate vaccination status. Participants who received Johnson & Johnson/Janssen COVID-19 vaccine for primary series were censored at the time of vaccination and could contribute only unvaccinated person-time. Participants who received Johnson & Johnson/Janssen COVID-19 vaccine for third dose were censored at the

time of vaccination and could contribute only unvaccinated, first dose, and second dose person-time.

### **Virus Predominance**

The date Omicron became predominant (>50% of cases) per site was determined using state public health department and CDC surveillance data. SARS-CoV-2 positive cases where lineage results were not yet available or not able to be sequenced (cycle threshold <30) were assumed to be Delta if the illness started prior to the Omicron predominance date at their site. If the illness started after the Omicron predominance date, they were assumed to be Omicron. Overall, 132 (21%) of the 627 SARS-CoV-2 infections occurred during co-circulation, of which 18 (14%) could not be sequenced. Sensitivity analyses are described in VE Sensitivity Analyses and indicate minimal impact on VE estimates when excluded from analysis.

### **Inverse Propensity of Treatment Weighting (IPTW)**

Data were broken into weeks and IPTW weights for immunization were calculated with boosted regression trees using baseline socio-demographic information and time-varying self-reported exposure and mask use.<sup>6</sup> Covariates were considered balanced if the standardized mean difference was  $\leq 0.2$  after weighting. For relative VE, IPTW was calculated using the probability of being three dose immunized compared to two dose immunized. IPTW was estimated separately for the Delta and Omicron predominant periods (**Figures S2a – S2d**).

### **Cox Model**

Hazard ratios were calculated by the Andersen-Gill model and vaccine effectiveness was then calculated as  $100\% \times (1 - \text{hazard ratio})$ .<sup>7</sup> Unadjusted VE was calculated as  $100\% \times (1 - \text{hazard ratio})$ . Adjusted Cox models were weighted using the stabilized weights and had site, local SARS-CoV-

2 circulation, and occupation as covariates a priori. Covariates that were not balanced after IPTW weighted were also put in the models and kept if they adjusted the estimates by  $\geq 5\%$ . Relative VE models were further adjusted by days since the most recent vaccine dose. Robust standard errors were used to account for the clustering by participant created by the stabilized weights.

### **Assumption of Proportional Hazard**

The proportional hazards assumption was checked for the main and subgroup Cox models by examining correlation between Schoenfeld residuals and time. No evidence of a non-zero slope was found with  $p > 0.05$  for all tests.

### **Incidence of SARS-CoV-2**

Incidence of SARS-CoV-2 during the Delta and Omicron predominant periods was calculated as the number of SARS-CoV-2 positive infections divided by the number of person-days in each period. There was overlap in Delta and Omicron circulation in December 2021. Cases with confirmed lineage counted towards their lineage even if in the opposite predominate period. (i.e., confirmed Omicron cases and associated person-time that occurred during the Delta predominant period counted towards Omicron). Rate ratio of incidence in the Omicron vs Delta periods was calculated using a Poisson model with log person-days as an offset.

### **Clinical characteristics of SARS-CoV-2 Cases**

Clinical characteristics of unvaccinated RT-PCR confirmed infections were compared by lineage, Delta or Omicron. Cases within 1 week of the Delta predominance date without lineage results were excluded. Percent of asymptomatic cases were compared for all remaining infections. Percent of cases reporting medical care were compared for symptomatic infections

with a completed final illness survey at the time of data cutoff. Odds ratios were calculated using unadjusted logistic regression (**Table S3**).

### **Handling of Missing Data**

All baseline covariates in the propensity models had complete data. Hours of exposure and percent PPE use were answered by participants when applicable. “Not applicable” was used as a valid response in the boosted regression model and all participant data was used.

### **VE Sensitivity Analysis**

Sensitivity analyses were conducted to examine potential (1) attrition bias by adding participants with low participation ( $\leq 20\%$  weekly swab submission) back to the study analytic sample. The adjusted VE against Delta changed from 91% (95% CI: 84–95) to 90% (95% CI: 83–95) and against Omicron changed from 60% (95% CI: 43–72) to 61% (95% CI: 43–73). Relative adjusted VE against Delta changed from 86% (95% CI: 69–94) to 84% (95% CI: 60–93) and against Omicron remained unchanged. In this sensitivity analysis, the overall pattern of findings was similar to the primary analyses. To examine potential (2) misclassification bias by treating not sequence-confirmed SARS-CoV-2 infections during co-circulation period as competing risk for the VE against Omicron infection. First, we treated infections that were not sequence-confirmed and had an onset date within 1 week of the Omicron predominance date as a competing risk. Adjusted VE changed from 60% (95% CI: 43–72) to 57% (95% CI: 38–71). Relative adjusted VE changed from 60% (95% CI: 40–73) to 60% (95% CI: 39–73). Second, we expanded to infections within 2 weeks of Omicron predominance. Adjusted VE changed from 60% (95% CI: 43–72) to 53% (95% CI: 27–69). Relative adjusted VE changed from 60% (95% CI: 40–73) to 60% (95% CI: 35–75). In all sensitivity analyses, the VE point estimate was only slightly reduced, but had a substantially wider confidence interval.

## Supplemental Results

**Figure S1a. CONSORT diagram of HEROES-RECOVER prospective cohort participants: Delta Variant Predominance**

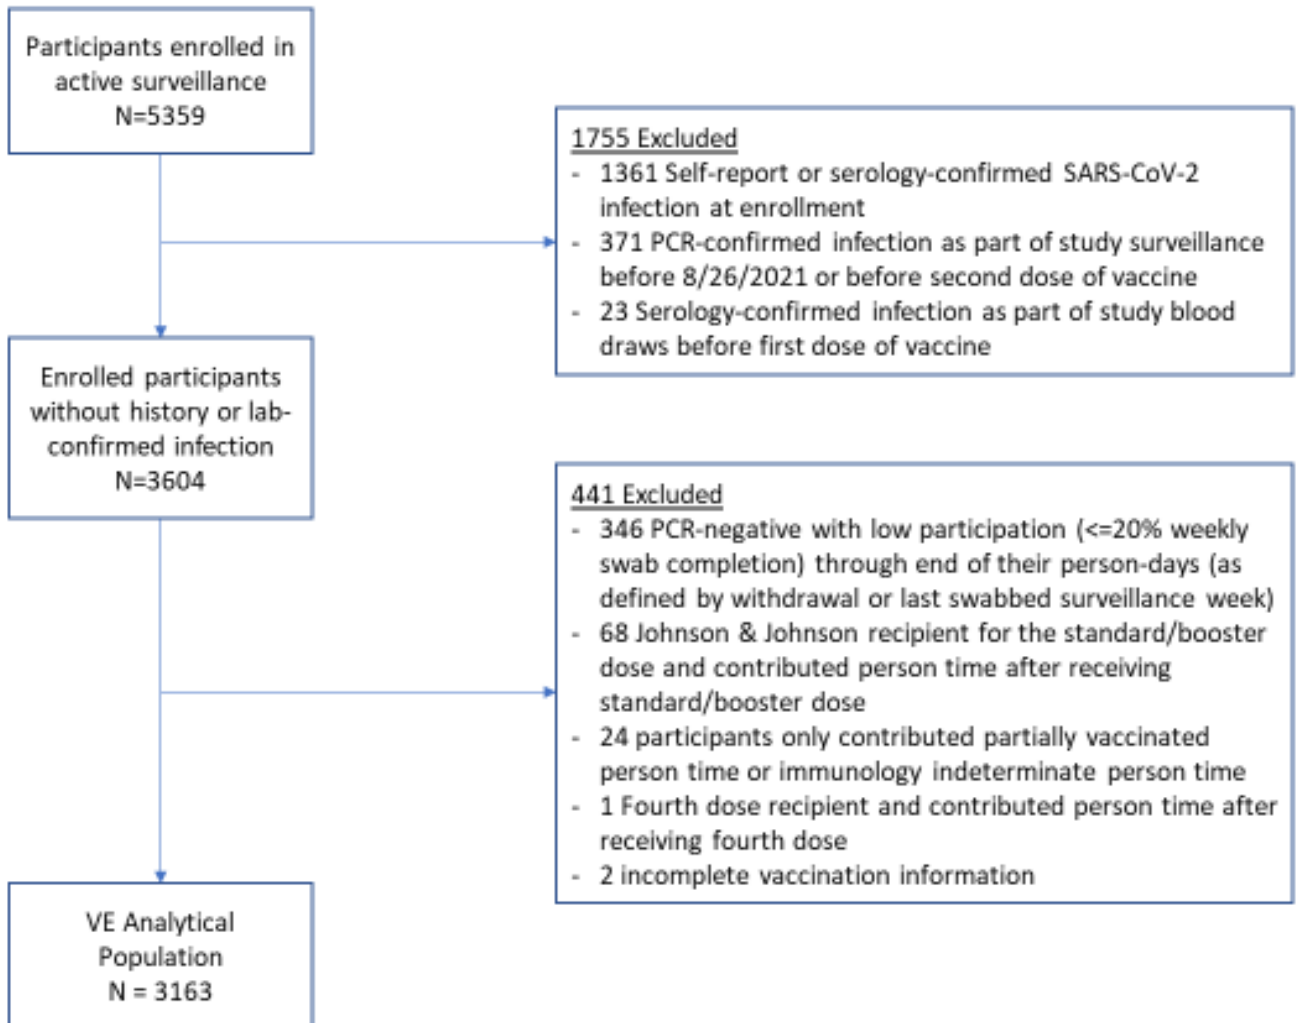

**Figure S1b. CONSORT diagram of HEROES-RECOVER prospective cohort participants: Omicron Variant Predominance**

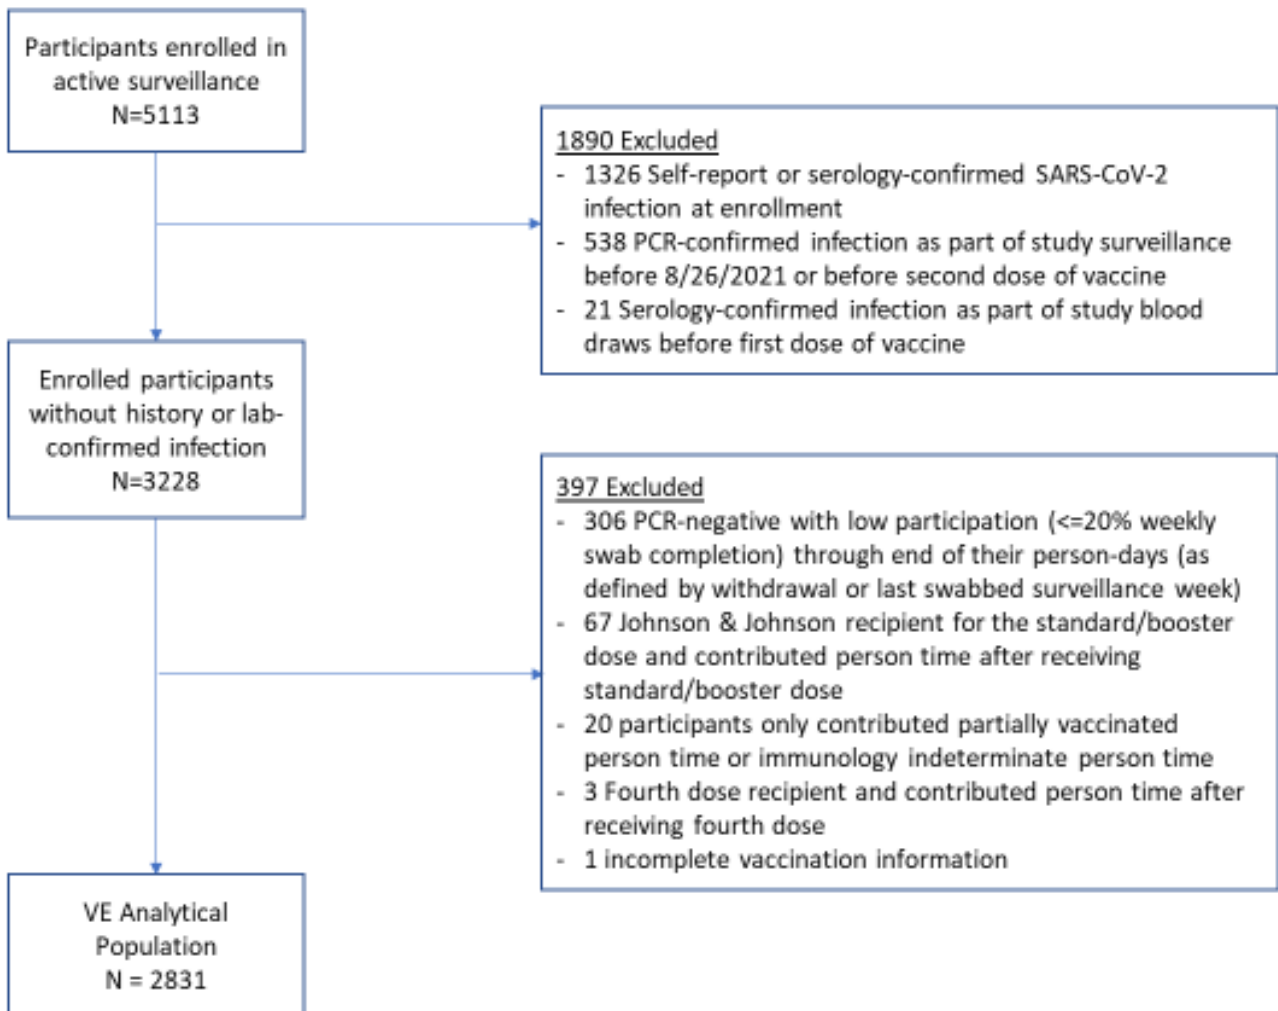

**Table S1. Participant characteristics by COVID-19 vaccination status at the end of the study period, August 2021 to January 2022**

| Characteristic              | Total<br>Participants,<br>(Col.%) | SARS-CoV-2<br>Infection<br>Participants,<br>(Row %) | COVID-19 Vaccination Status              |                                                        |                                    |
|-----------------------------|-----------------------------------|-----------------------------------------------------|------------------------------------------|--------------------------------------------------------|------------------------------------|
|                             |                                   |                                                     | Unvaccinated<br>Participants,<br>(Row %) | 1- or 2-dose<br>Vaccinated<br>Participants,<br>(Row %) | 3-Dose<br>Participants,<br>(Row %) |
| All Participants            | 3,241                             | 627 (19.3)                                          | 333 (10.3)                               | 1021 (31.5)                                            | 1887 (58.2)                        |
| Variant predominance period |                                   |                                                     |                                          |                                                        |                                    |
| B.1.617.2 (Delta)           | 1855 (57.2)                       | 407 (21.9)                                          | 160 (8.6)                                | 606 (32.7)                                             | 1089 (58.7)                        |
| B.1.1.529 (Omicron)         | 1386 (42.8)                       | 220 (15.9)                                          | 173 (12.5)                               | 415 (29.9)                                             | 798 (57.6)                         |
| Cohort location             |                                   |                                                     |                                          |                                                        |                                    |
| Phoenix, AZ                 | 308 (9.5)                         | 72 (23.4)                                           | 21 (6.8)                                 | 121 (39.3)                                             | 166 (53.9)                         |
| Tucson, AZ                  | 899 (27.7)                        | 163 (18.1)                                          | 129 (14.3)                               | 379 (42.2)                                             | 391 (43.5)                         |
| Other areas in AZ           | 219 (6.8)                         | 52 (23.7)                                           | 41 (18.7)                                | 88 (40.2)                                              | 90 (41.1)                          |
| Miami, FL                   | 221 (6.8)                         | 76 (34.4)                                           | 58 (26.2)                                | 98 (44.3)                                              | 65 (29.4)                          |
| Duluth, MN                  | 435 (13.4)                        | 73 (16.8)                                           | 12 (2.8)                                 | 47 (10.8)                                              | 376 (86.4)                         |
| Portland, OR                | 457 (14.1)                        | 54 (11.8)                                           | 23 (5.0)                                 | 54 (11.8)                                              | 380 (83.2)                         |
| Temple, TX                  | 228 (7.0)                         | 44 (19.3)                                           | 14 (6.1)                                 | 76 (33.3)                                              | 138 (60.5)                         |
| Salt Lake City, UT          | 474 (14.6)                        | 93 (19.6)                                           | 35 (7.4)                                 | 158 (33.3)                                             | 281 (59.3)                         |
| Age group, yrs              |                                   |                                                     |                                          |                                                        |                                    |
| 18 - 49                     | 2244 (69.2)                       | 457 (20.4)                                          | 243 (10.8)                               | 701 (31.2)                                             | 1300 (57.9)                        |
| ≥50                         | 997 (30.8)                        | 170 (17.1)                                          | 90 (9.0)                                 | 320 (32.1)                                             | 587 (58.9)                         |
| Sex*                        |                                   |                                                     |                                          |                                                        |                                    |
| Female                      | 2036 (62.8)                       | 369 (18.1)                                          | 148 (7.3)                                | 636 (31.2)                                             | 1252 (61.5)                        |
| Male                        | 1200 (37.0)                       | 258 (21.5)                                          | 184 (15.3)                               | 384 (32.0)                                             | 632 (52.7)                         |
| Race†                       |                                   |                                                     |                                          |                                                        |                                    |
| White                       | 3073 (94.8)                       | 595 (19.4)                                          | 298 (9.7)                                | 952 (31.0)                                             | 1823 (59.3)                        |
| Other Race                  | 168 (5.2)                         | 32 (19.0)                                           | 35 (20.8)                                | 69 (41.1)                                              | 64 (38.1)                          |
| Ethnicity <sup>‡</sup>      |                                   |                                                     |                                          |                                                        |                                    |
| Hispanic/Latino             | 467 (14.4)                        | 111 (23.8)                                          | 66 (14.1)                                | 221 (47.3)                                             | 180 (38.5)                         |

|                                      |             |            |            |            |             |
|--------------------------------------|-------------|------------|------------|------------|-------------|
| Other                                | 2774 (85.6) | 516 (18.6) | 267 (9.6)  | 800 (28.8) | 1707 (61.5) |
| Occupation                           |             |            |            |            |             |
| Primary HCP                          | 700 (21.6)  | 97 (13.9)  | 10 (1.4)   | 124 (17.7) | 566 (80.9)  |
| Nurses & other allied HCP            | 1071 (33.0) | 180 (16.8) | 67 (6.3)   | 300 (28.0) | 704 (65.7)  |
| First Responders, fire fighters      | 422 (13.0)  | 129 (30.6) | 104 (24.6) | 173 (41.0) | 145 (34.4)  |
| First Responders, law enforcement    | 158 (4.9)   | 51 (32.3)  | 39 (24.7)  | 72 (45.6)  | 47 (29.7)   |
| Frontline workers, public-facing     | 675 (20.8)  | 135 (20.0) | 68 (10.1)  | 265 (39.3) | 342 (50.7)  |
| Frontline workers, non-public-facing | 215 (6.6)   | 35 (16.3)  | 45 (20.9)  | 87 (40.5)  | 83 (38.6)   |
| Chronic medical condition            |             |            |            |            |             |
| None                                 | 2862 (88.3) | 595 (20.8) | 311 (10.9) | 980 (34.2) | 1571 (54.9) |
| One or more                          | 215 (6.6)   | 35 (16.3)  | 45 (20.9)  | 87 (40.5)  | 83 (38.6)   |
| Vaccine product                      |             |            |            |            |             |
| Moderna (mRNA-1273)                  | 887 (27.4)  | 160 (18.0) | —          | 439 (9.5)  | 448 (50.5)  |
| Pfizer-BioNTech (BNT162b2)           | 1917 (59.1) | 330 (17.2) | —          | 553 (28.8) | 1364 (71.2) |
| Combination of mRNA products         | 74 (2.3)    | 7 (9.5)    | —          | 0 (0.0)    | 74 (100.0)  |

Abbreviations: severe acute respiratory syndrome coronavirus 2 (SARS-CoV-2), standard mean difference (SMD), messenger RNA (mRNA), healthcare provider (HCP).

\* Participants who did not report gender or identified as Other (n=17) were counted in the most common category (female).

† Participants who did not report race (n=4) were counted with Other Race.

‡ Participants who did not report ethnicity (n=77) were counted with Other.

¶ Participants (n=98) who did not provide a response, the data were imputed as none, pending further verification.



**Table S2. Distribution of Participant Person-time Contributed to Vaccination Status Categories According to Virus and Participant Characteristics\***

| Characteristic              | Total <sup>†</sup>   |                        | COVID-19 Vaccination Status |                        |                                   |                        |                                  |                        |
|-----------------------------|----------------------|------------------------|-----------------------------|------------------------|-----------------------------------|------------------------|----------------------------------|------------------------|
|                             | Participant<br>s No. | Person-days<br>No. (%) | Unvaccinated                |                        | 2-Dose<br>(≥14 days after dose 2) |                        | 3-Dose<br>(≥7 days after dose 3) |                        |
|                             |                      |                        | Participants<br>No.         | Person-days<br>No. (%) | Participants<br>No.               | Person-days<br>No. (%) | Participants<br>No.              | Person-days<br>No. (%) |
| All Participants            | 3,241                | 439,411                | 391                         | 34,956                 | 2,779                             | 236,084                | 1,801                            | 168,371                |
| Variant predominance period |                      |                        |                             |                        |                                   |                        |                                  |                        |
| B.1.617.2 (Delta)           | 4,814                | 337,846 (76.9)         | 343                         | 27,206 (77.8)          | 2,764                             | 204,398 (86.6)         | 1,707                            | 106,242 (63.1)         |
| B.1.1.529 (Omicron)         | 2,896                | 101,565 (23.1)         | 255                         | 7,750 (22.2)           | 938                               | 31,686 (13.4)          | 1,708                            | 62,129 (36.9)          |
| Cohort location             |                      |                        |                             |                        |                                   |                        |                                  |                        |
| Phoenix, AZ                 | 702                  | 41,166 (9.4)           | 39                          | 2,645 (7.6)            | 369                               | 23,482 (9.9)           | 295                              | 15,039 (8.9)           |
| Tucson, AZ                  | 2,003                | 120,048 (27.3)         | 203                         | 11,023 (31.5)          | 1,083                             | 74,732 (31.7)          | 719                              | 34,293 (20.4)          |
| Other areas in AZ           | 472                  | 27,947 (6.4)           | 65                          | 3,786 (10.8)           | 244                               | 17,474 (7.4)           | 163                              | 6,687 (4.0)            |
| Miami, FL                   | 463                  | 27,435 (6.2)           | 105                         | 6,534 (18.7)           | 241                               | 16,245 (6.9)           | 117                              | 4,656 (2.8)            |
| Duluth, MN                  | 1,136                | 60,418 (13.7)          | 23                          | 1,586 (4.5)            | 454                               | 23,967 (10.2)          | 660                              | 34,865 (20.7)          |
| Portland, OR                | 1,225                | 65,622 (14.9)          | 52                          | 2,694 (7.7)            | 477                               | 27,359 (11.6)          | 696                              | 35,569 (21.1)          |
| Temple, TX                  | 529                  | 29,185 (6.6)           | 27                          | 1,501 (4.3)            | 271                               | 16,264 (6.9)           | 231                              | 11,420 (6.8)           |
| Salt Lake City, UT          | 1,180                | 67,590 (15.4)          | 84                          | 5,187 (14.8)           | 563                               | 36,561 (15.5)          | 534                              | 25,842 (15.3)          |
| Age group, yrs              |                      |                        |                             |                        |                                   |                        |                                  |                        |
| 18 - 49                     | 5,302                | 299,371 (68.1)         | 429                         | 24,281 (69.5)          | 2,537                             | 161,018 (68.2)         | 2,339                            | 114,072 (67.8)         |
| ≥50                         | 2,408                | 140,040 (31.9)         | 169                         | 10,675 (30.5)          | 1,165                             | 75,066 (31.8)          | 1,076                            | 54,299 (32.2)          |
| Sex <sup>‡</sup>            |                      |                        |                             |                        |                                   |                        |                                  |                        |
| Female                      | 4,951                | 280,186 (63.8)         | 297                         | 18,352 (52.5)          | 2,377                             | 148,674 (63.0)         | 22,80                            | 113,160 (67.2)         |
| Male                        | 2,759                | 159,225 (36.2)         | 301                         | 16,604 (47.5)          | 1,325                             | 87,410 (37.0)          | 1,135                            | 55,211 (32.8)          |
| Race <sup>§</sup>           |                      |                        |                             |                        |                                   |                        |                                  |                        |
| White                       | 7,355                | 418,585 (95.3)         | 546                         | 31,972 (91.5)          | 3,515                             | 223,612 (94.7)         | 3,299                            | 163,001 (96.8)         |
| Other Race                  | 355                  | 20,826 (4.7)           | 52                          | 2,984 (8.5)            | 187                               | 12,472 (5.3)           | 116                              | 5,370 (3.2)            |
| Ethnicity <sup>  </sup>     |                      |                        |                             |                        |                                   |                        |                                  |                        |
| Hispanic/Latino             | 1,034                | 62,557 (14.2)          | 119                         | 7,346 (21.0)           | 586                               | 39,650 (16.8)          | 330                              | 15,561 (9.2)           |
| Other                       | 6,676                | 376,854 (85.8)         | 479                         | 27,610 (79.0)          | 3,116                             | 196,434 (83.2)         | 3,085                            | 152,810 (90.8)         |
| Occupation                  |                      |                        |                             |                        |                                   |                        |                                  |                        |
| Primary HCP                 | 1,841                | 101,003 (23.0)         | 20                          | 894 (2.6)              | 771                               | 42,923 (18.2)          | 1,051                            | 57,186 (34.0)          |

|                                        |       |                |     |               |       |                |       |                |
|----------------------------------------|-------|----------------|-----|---------------|-------|----------------|-------|----------------|
| Nurses & other HCP                     | 2,636 | 147,766 (33.6) | 141 | 9,262 (26.5)  | 1,229 | 73,026 (30.9)  | 1,269 | 65,478 (38.9)  |
| First Responders                       | 1,211 | 71,895 (16.4)  | 229 | 12,022 (34.4) | 637   | 46,031 (19.5)  | 345   | 13,842 (8.2)   |
| Other essential / frontline workers    | 2,022 | 118,747 (27.0) | 208 | 12,778 (36.6) | 1,065 | 74,104 (31.4)  | 750   | 31,865 (18.9)  |
| Chronic medical condition <sup>¶</sup> |       |                |     |               |       |                |       |                |
| None                                   | 5,255 | 300,399 (68.4) | 466 | 27,117 (77.6) | 2,546 | 164,583 (69.7) | 2,247 | 108,699 (64.6) |
| One or more                            | 2,455 | 139,012 (31.6) | 132 | 7,839 (22.4)  | 1,156 | 71,501 (30.3)  | 1,168 | 59,672 (35.4)  |
| Vaccine product                        |       |                |     |               |       |                |       |                |
| Moderna (mRNA-1273)                    | 2,101 | 126,762 (28.8) | —   | —             | 1324  | 96,089 (40.7)  | 778   | 30,673 (18.2)  |
| Pfizer-BioNTech (BNT162b2)             | 4,814 | 269,735 (61.4) | —   | —             | 2378  | 139,995 (59.3) | 2440  | 129,740 (77.1) |
| Combination of mRNA products           | 197   | 7,958 (1.8)    | —   | —             | 0     | 0              | 197   | 7,958 (4.7)    |

\* Abbreviations: severe acute respiratory syndrome coronavirus 2 (SARS-CoV-2), standard mean difference (SMD), messenger RNA (mRNA), healthcare provider (HCP).

† The total number of participants included in this study does not equal the sum of participants shown in each vaccination status category. A participant may contribute to one or more category, since vaccination status is time-varying. For example, a participant who has already received a 3<sup>rd</sup> vaccine dose at the start of the study period would only contribute person time to the 3-Dose status, thus not appear in the Unvaccinated or 2-Dose categories. A recent vaccinee may contribute person time to both Unvaccinated and 2-Dose person time, thus appearing twice. The purpose of this table is to demonstrate the distribution of person-time contributed by each of the characteristics.

‡ Participants who did not report gender or identified as Other (n=17, 958 person-days) were counted in the most common category (female).

§ Participants who did not report race (n=4, 236 person-days) were counted with Other Race.

¶ Participants who did not report ethnicity (n=77, 4,512 person-days) were counted with Other.

¶ Participants (5,959 person-days) who did not provide a response, the data were imputed as none, pending further verification.

**Table S3. Comparison of SARS-CoV-2 Delta and Omicron variant infection clinical characteristics among unvaccinated HEROES-RECOVER study participants**

|                             | Total<br>Infections<br>No. (%) | Delta<br>No. (%) | Omicron<br>No. (%) | Odds<br>Ratio* | 95%CI       |
|-----------------------------|--------------------------------|------------------|--------------------|----------------|-------------|
| Total participants, no. (%) | 131 (100)                      | 51 (100)         | 80 (100)           | --             | --          |
| Asymptomatic                | 21 (16.0)                      | 4 (7.8)          | 17 (21.3)          | 0.32           | 0.10–1.00   |
| COVID-19 symptoms           | 110 (84.0)                     | 47 (92.2)        | 63 (78.8)          |                |             |
| Fever                       | 73 (55.7)                      | 33 (70.2)        | 40 (63.5)          | 0.85           | 0.37 -1.93  |
| Cough                       | 80 (61.1)                      | 37 (78.7)        | 43 (68.3)          | 0.68           | 0.28 -1.68  |
| Chills                      | 63 (48.1)                      | 32 (68.1)        | 31 (49.2)          | 0.50           | 0.23 - 1.11 |
| Shortness of breath         | 23 (17.6)                      | 18 (38.3)        | 5 (7.9)            | 0.15           | 0.05 - 0.43 |
| Sore throat                 | 51 (38.9)                      | 24 (51.1)        | 27 (42.9)          | 0.78           | 0.36 - 1.69 |
| Diarrhea                    | 25 (19.1)                      | 11 (23.4)        | 14 (22.2)          | 1.0            | 0.40 - 2.46 |
| Muscle aches                | 84 (64.1)                      | 38 (80.9)        | 46 (73.0)          | 0.78           | 0.30 - 1.99 |
| Change in smell or taste    | 38 (29.0)                      | 29 (61.7)        | 9 (14.3)           | 0.11           | 0.04 - 0.28 |
| Received medical care       | 32 (24.4)                      | 19 (37.2)        | 13 (16.3)          | 0.43           | 0.18 - 0.99 |

\* Presence of symptoms was assessed by variant type, comparing Delta infections as the referent group to Omicron infections, among unvaccinated participants.

**Table S4. Representativeness of HEROES-RECOVER Study Participants**

|                                                 |                                                                                                                                                                                                                                                                                                                                                                                                                                                                                                                                                                                             |
|-------------------------------------------------|---------------------------------------------------------------------------------------------------------------------------------------------------------------------------------------------------------------------------------------------------------------------------------------------------------------------------------------------------------------------------------------------------------------------------------------------------------------------------------------------------------------------------------------------------------------------------------------------|
| <b>Disease under investigation</b>              | SARS-CoV-2 infection and COVID-19 illness                                                                                                                                                                                                                                                                                                                                                                                                                                                                                                                                                   |
| <b>Sex and gender</b>                           | The HEROES-RECOVER study population is 57% HCP, and correspondingly, predominantly female, which is reflective of the healthcare population.                                                                                                                                                                                                                                                                                                                                                                                                                                                |
| <b>Age</b>                                      | The HEROES-RECOVER study population is comprised of working adults, predominantly aged <50 years.                                                                                                                                                                                                                                                                                                                                                                                                                                                                                           |
| <b>Race or ethnic group</b>                     | Black and Asian populations are underrepresented in the HEROES-RECOVER study population.                                                                                                                                                                                                                                                                                                                                                                                                                                                                                                    |
| <b>Geography</b>                                | COVID-19 cases vary by different regions in the U.S., of which our cohort only represents 6 states.                                                                                                                                                                                                                                                                                                                                                                                                                                                                                         |
| <b>Other considerations</b>                     | The HEROES-RECOVER study population is a highly vaccinated population relative to the general population                                                                                                                                                                                                                                                                                                                                                                                                                                                                                    |
| <b>Overall representativeness of this study</b> | The HEROES-RECOVER study population is composed of frontline workers such as healthcare workers, first responders, and other essential workers who provide direct care or services to the public placing them at higher risk of exposure to SARS-CoV-2 than the general population. Majority are in the 18-49 age group and white. Depending on the occupation, some occupations are heavily tilted towards a gender (i.e. majority of first responders were male). This multicenter study network consists of workers from 6 states: Arizona, Utah, Minnesota, Oregon, Florida, and Texas. |

**Figure\_S2a. Standardized mean differences of covariates between unvaccinated and vaccinated participants during Delta predominance era before and after inverse propensity of treatment weighting**

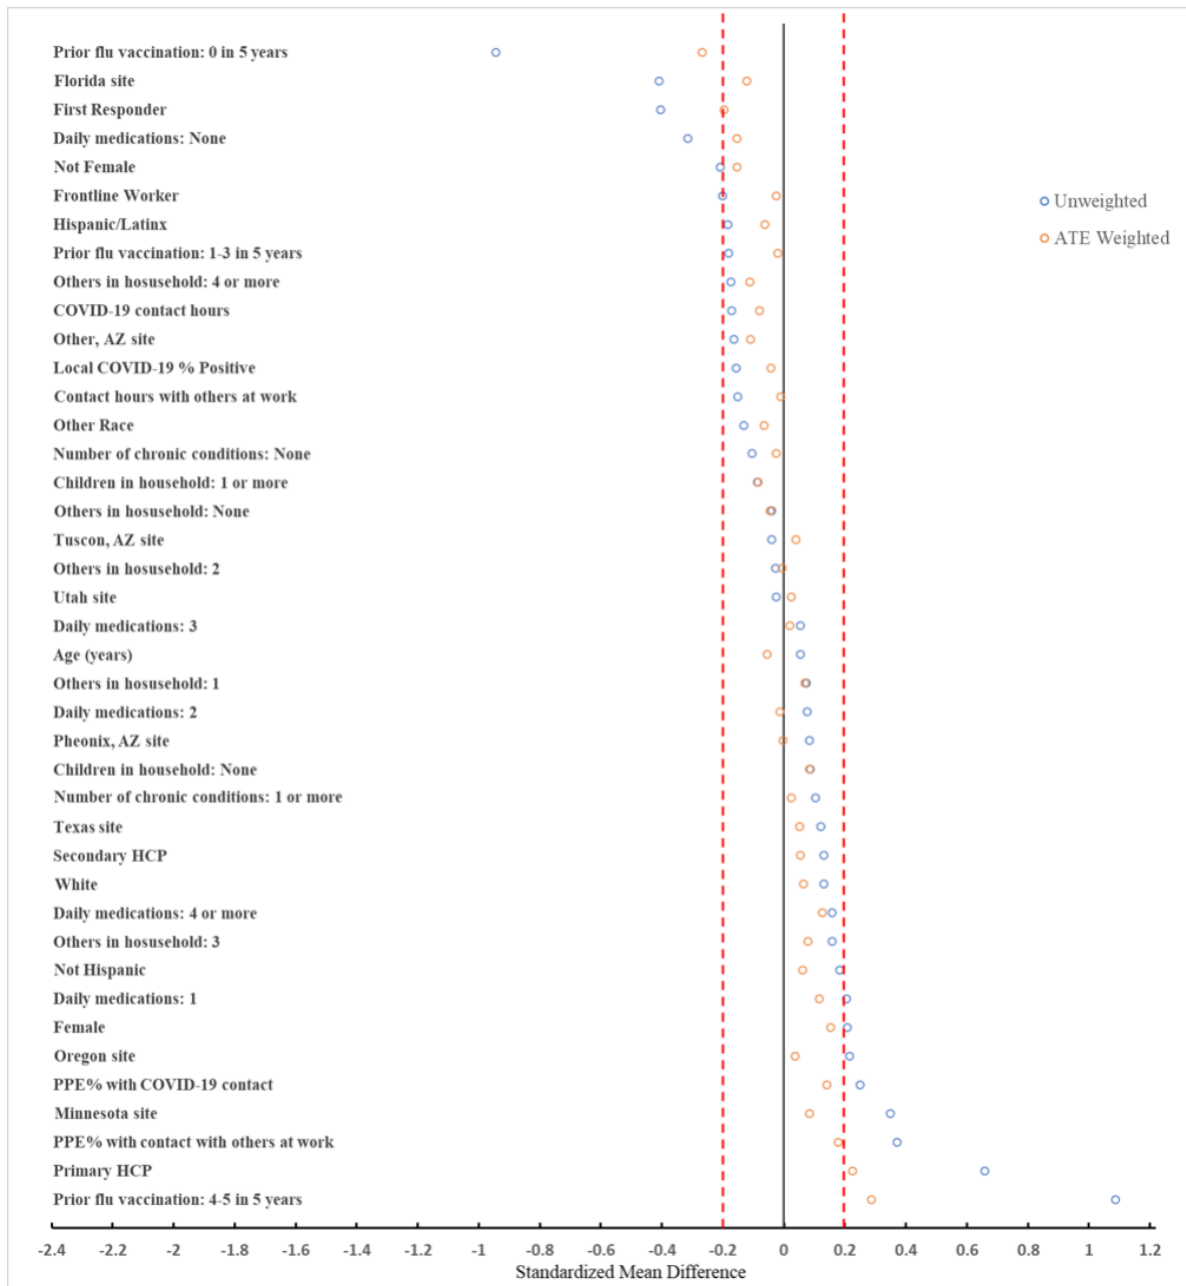

Legend: Negative differences indicate groups that are less likely to be vaccinated and positive differences indicate those more likely to be vaccinated. Absolute standard mean differences of less than 0.2 are considered well balanced. The largest difference after ATE weighting was 0.29.

Abbreviation: Average treatment effect weighted (ATE)

**Figure\_S2b. Standardized mean differences of covariates between 2-dose and 3-dose vaccinated participants during Delta predominance era before and after inverse propensity of treatment weighting**

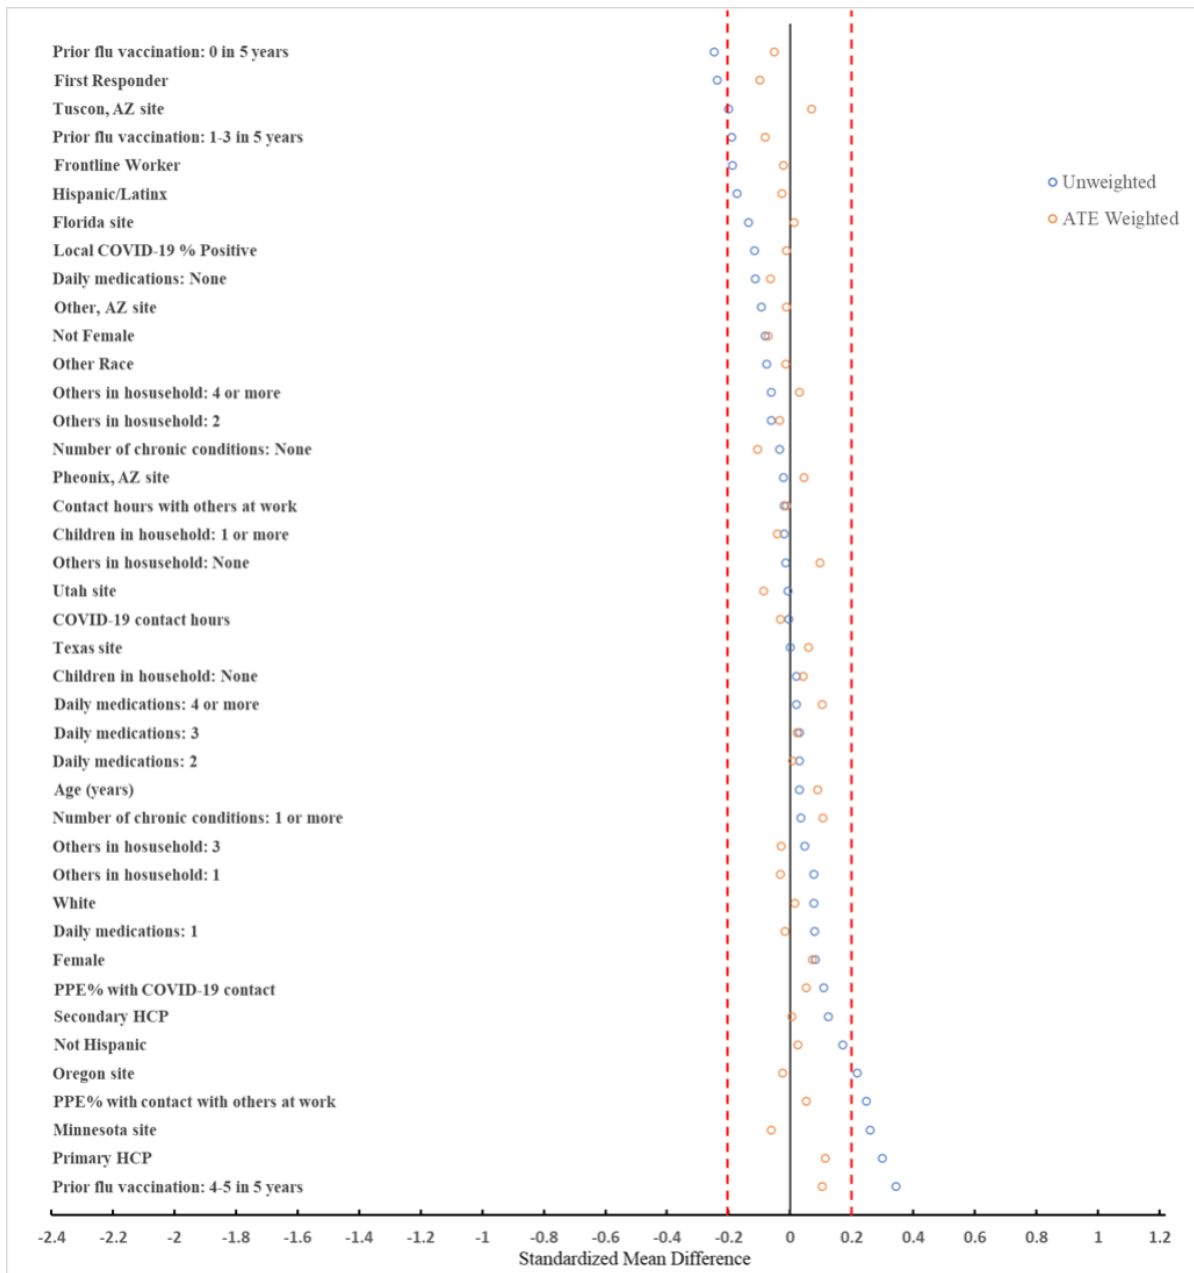

Legend: Negative differences indicate groups that are less likely to be vaccinated and positive differences indicate those more likely to be vaccinated. Absolute standard mean differences of less than 0.2 are considered well balanced. The largest difference after ATE weighting was 0.11.

Abbreviation: Average treatment effect weighted (ATE)

**Figure\_S2c. Standardized mean differences of covariates between unvaccinated and vaccinated participants during Omicron predominance era before and after inverse propensity of treatment weighting**

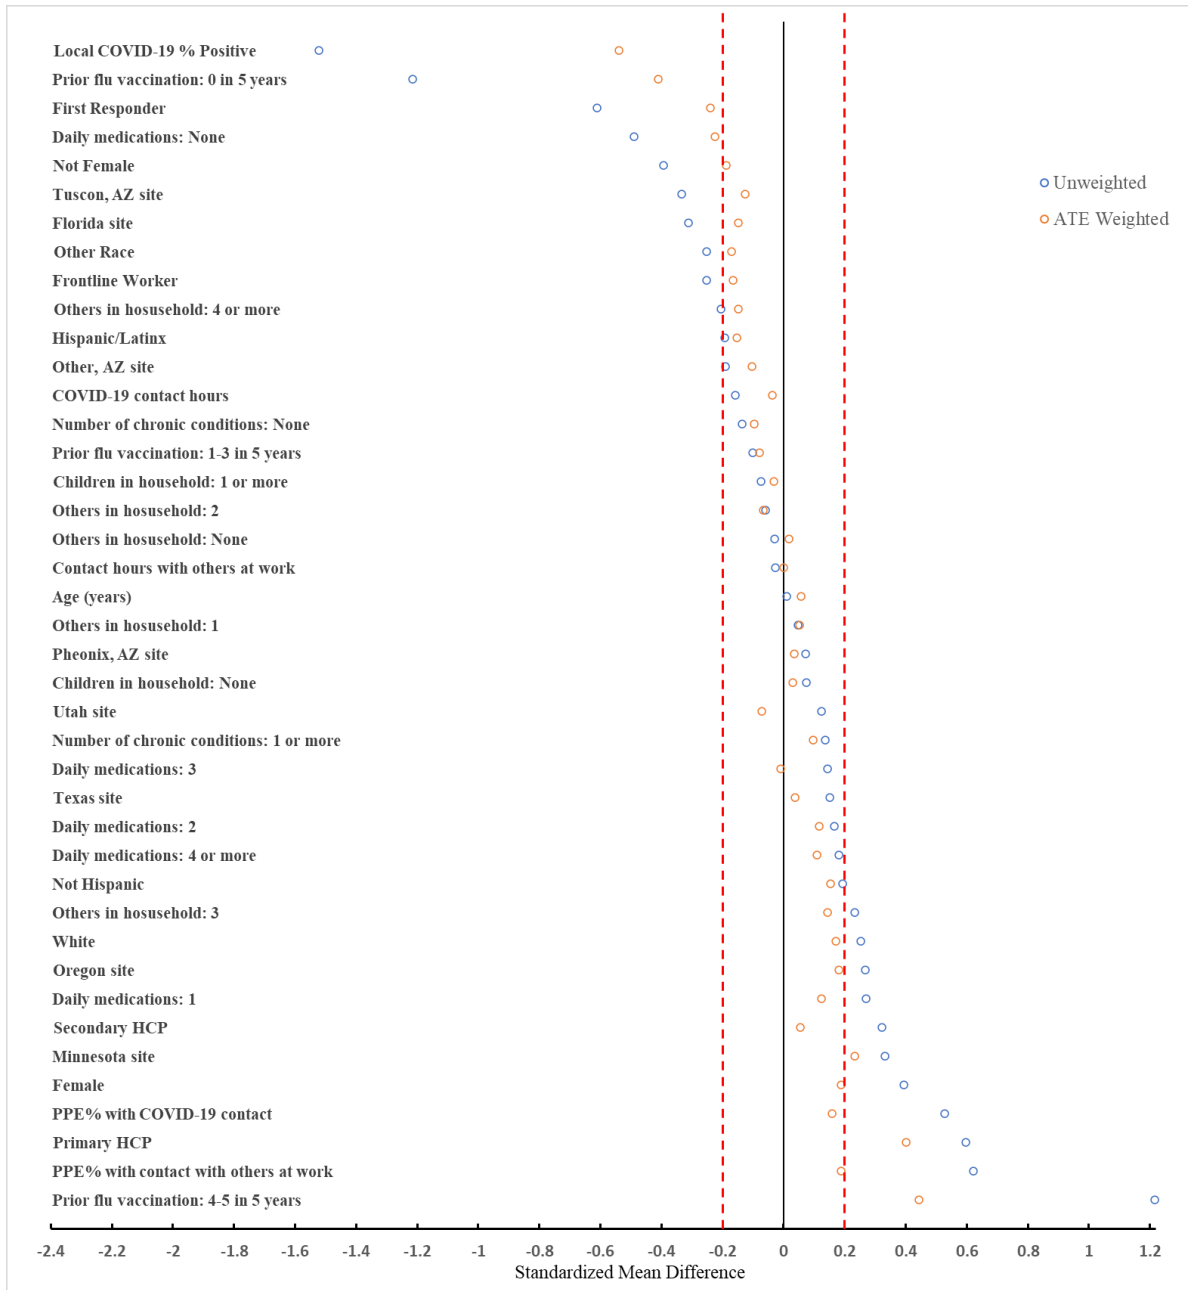

Legend: Negative differences indicate groups that are less likely to be vaccinated and positive differences indicate those more likely to be vaccinated. Absolute standard mean differences of less than 0.2 are considered well balanced. The largest difference after ATE weighting was 0.54.

Abbreviation: Average treatment effect weighted (ATE)

**Figure\_S2d. Standardized mean differences of covariates between 2-dose and 3-dose vaccinated participants during Omicron predominance era before and after inverse propensity of treatment weighting**

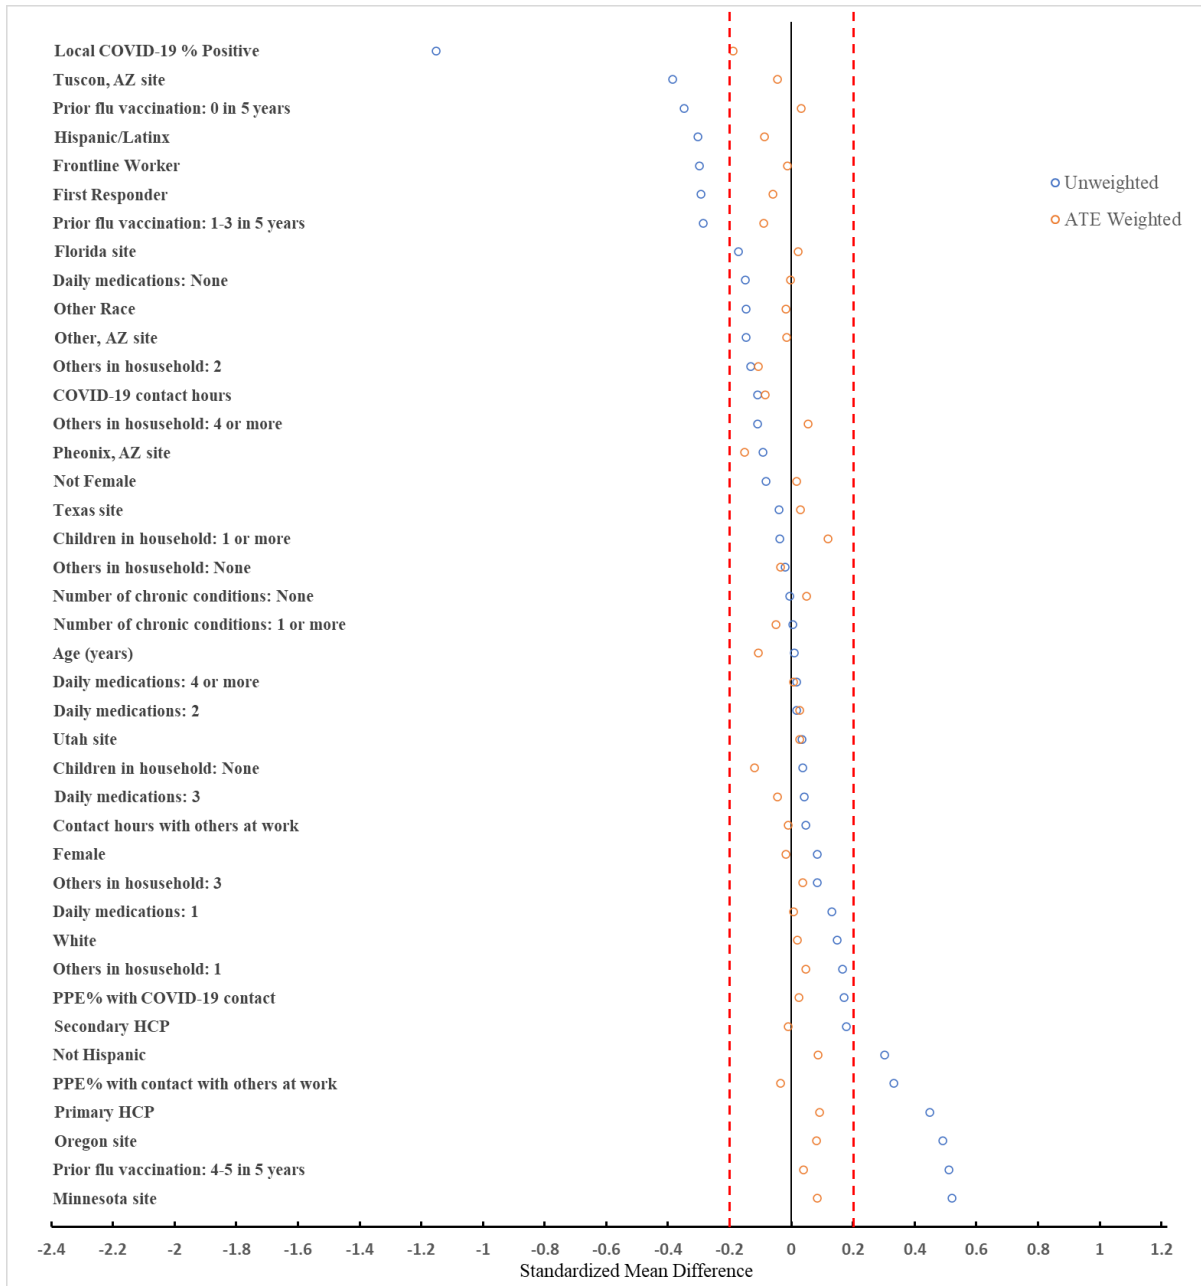

Legend: Negative differences indicate groups that are less likely to be vaccinated and positive differences indicate those more likely to be vaccinated. Absolute standard mean differences of less than 0.2 are considered well balanced. The largest difference after ATE weighting was 0.19.

Abbreviation: Average treatment effect weighted (ATE)

## REFERENCES

1. Thompson MG, Burgess JL, Naleway AL, et al. Prevention and Attenuation of Covid-19 with the BNT162b2 and mRNA-1273 Vaccines. *N Engl J Med* 2021 (In eng). DOI: 10.1056/NEJMoa2107058.
2. Edwards LJ, Fowlkes AL, Wesley MG, et al. Research on the Epidemiology of SARS-CoV-2 in Essential Response Personnel (RECOVER): Protocol for a Multisite Longitudinal Cohort Study. *JMIR Res Protoc* 2021;10(12):e31574. (In eng). DOI: 10.2196/31574.
3. Lutrick K, Ellingson DK, Baccam Z, et al. COVID-19 Infection, Reinfection, and Vaccine Effectiveness in a Prospective Cohort of Arizona Frontline/Essential Workers: The AZ HEROES Research Protocol. *JMIR Res Protoc* 2021;10(6):e28925. (In eng). DOI:10.2196/28925.
4. FDA. TaqPath™ COVID-19 Combo Kit. In vitro diagnostics EUAs. US Department of Health and Human Services, Food and Drug Administration, 2020.
5. Paden CR, Tao Y, Queen K, et al. Rapid, Sensitive, Full-Genome Sequencing of Severe Acute Respiratory Syndrome Coronavirus 2. *Emerg Infect Dis* 2020;26(10):2401-2405. (In eng). DOI: 10.3201/eid2610.201800.
6. Robins JM, Hernán MA, Brumback B. Marginal structural models and causal inference in epidemiology. *Epidemiology* 2000;11(5):550-60. (In eng). DOI: 10.1097/00001648-200009000-00011.
7. Therneau TM GP. Modeling survival data: Extending the Cox model. New York: Springer, 2000.
